# Supplementary material
Source: PubMed Central journal article supplement (PMC8753434)
Supplement: mmc1.pdf [file mmc1.pdf]

YMTHE, Volume 30

## **Supplemental Information**

**circMRPS35 promotes malignant  
progression and cisplatin resistance  
in hepatocellular carcinoma**

**Peng Li, Runjie Song, Fan Yin, Mei Liu, Huijiao Liu, Shuoqian Ma, Xiaomeng Jia, Xiaohui Lu, Yuting Zhong, Lei Yu, Xiru Li, and Xiangdong Li**

**Figure S1**

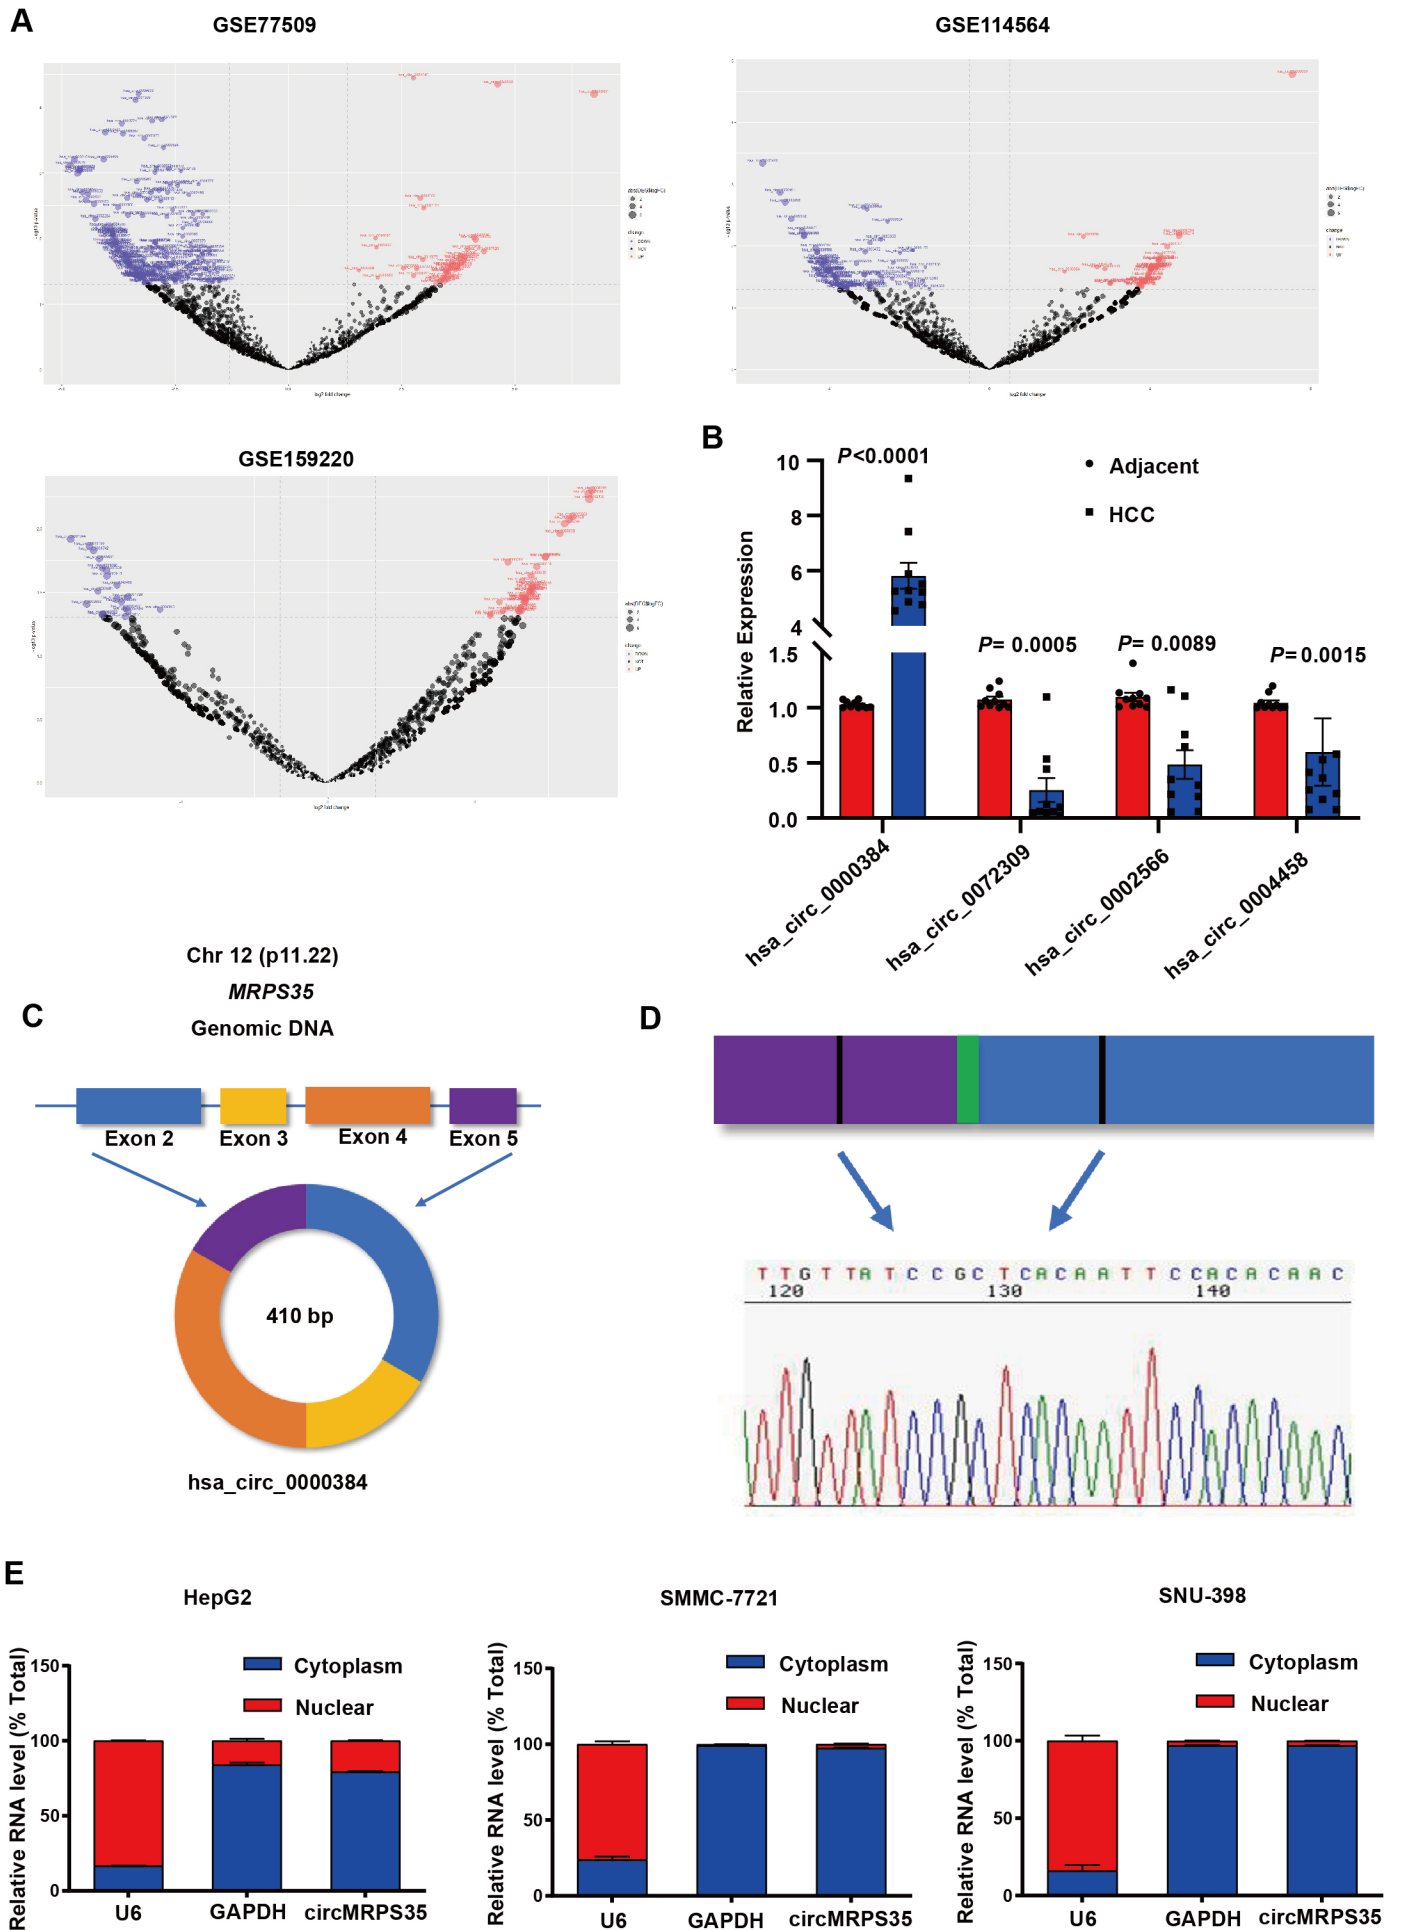

Figure S2

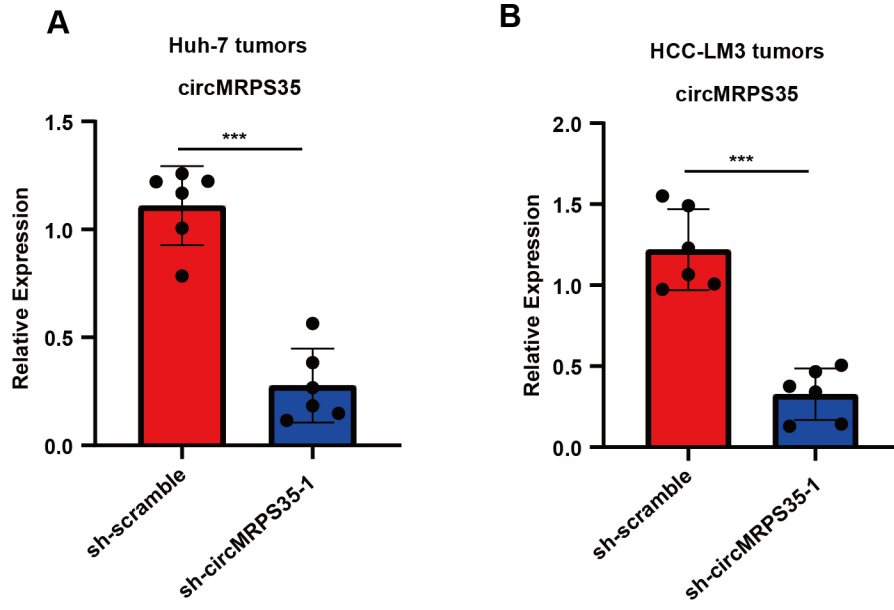

**Figure S3**

**A**

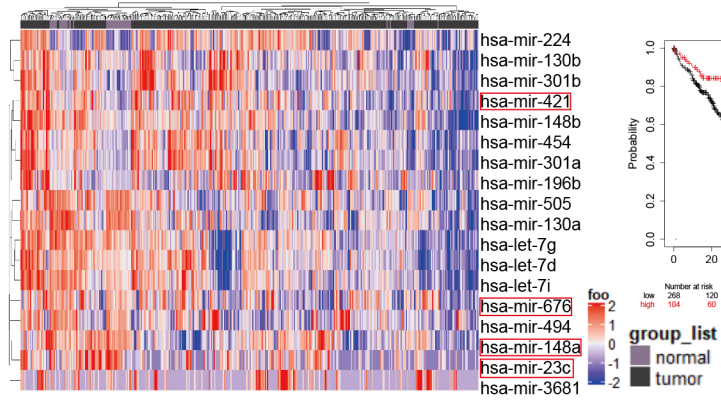

**B**

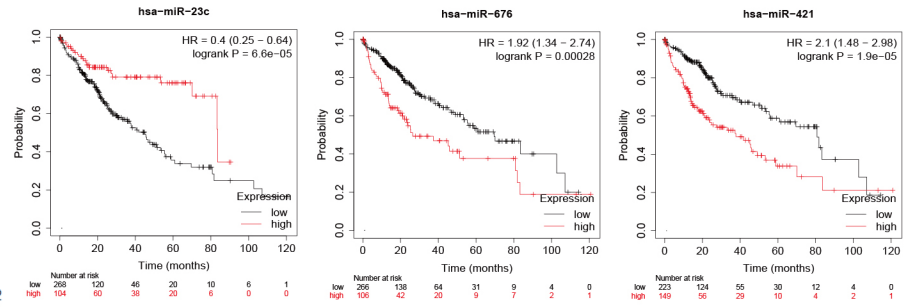

**C**

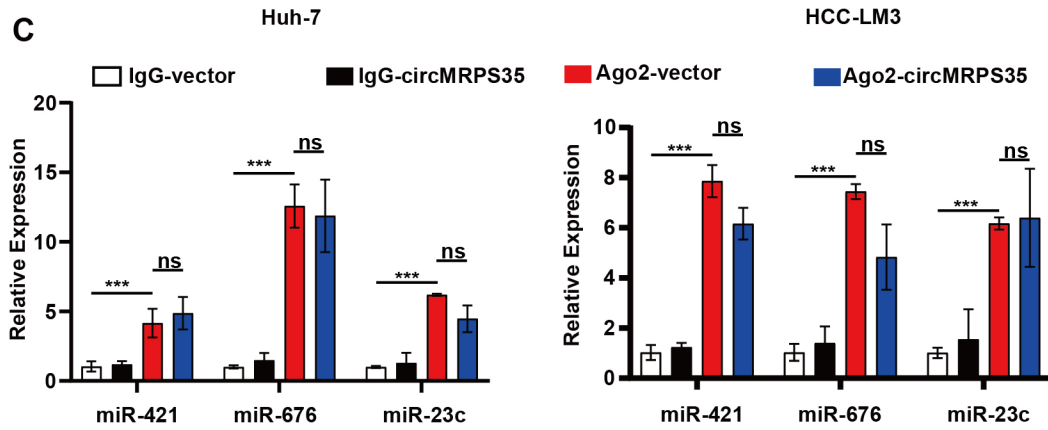

**D**

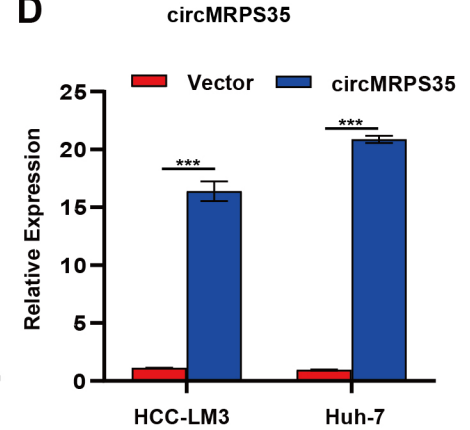

**E**

miR-148a 3' UGUUUCAAGACAUC **ACGUGACU** 5'  
 miR-148b 3' UGUUUCAAGACACU **ACGUGACU** 5'  
 miR-152 3' GGUUCAAGACAGU **ACGUGACU** 5'

**F**

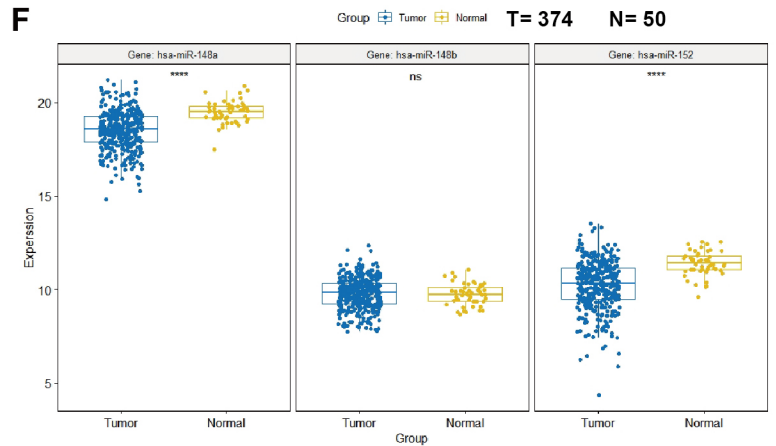

**G**

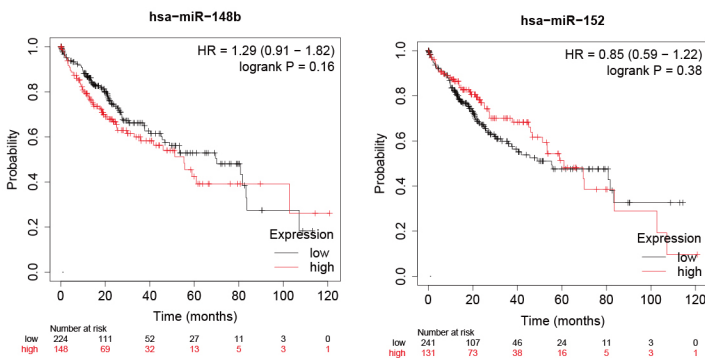

**H**

| circbase ID      | miRNA ID        | targetscan binding site (positions) |
|------------------|-----------------|-------------------------------------|
| has_circ_0000384 | has-miR-148a-3p | 251-256, 276-283, 294-299, 346-352  |

**I**

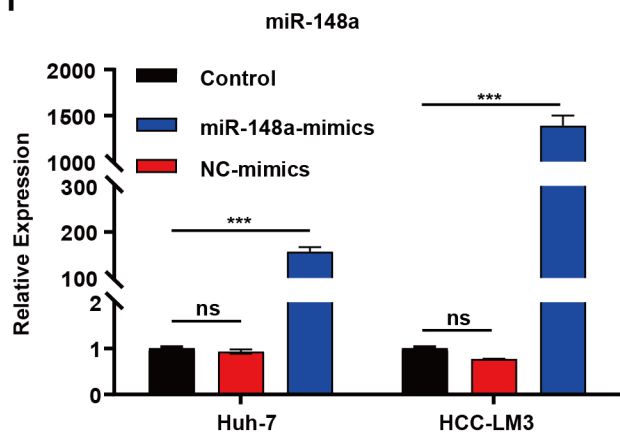

**Figure S4**

**A**

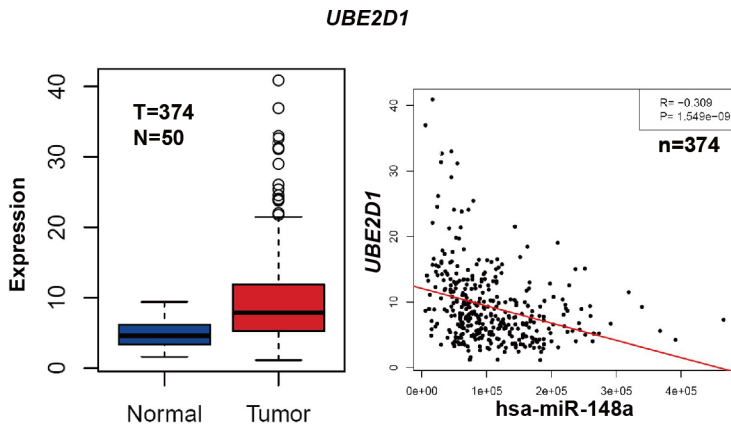

**B**

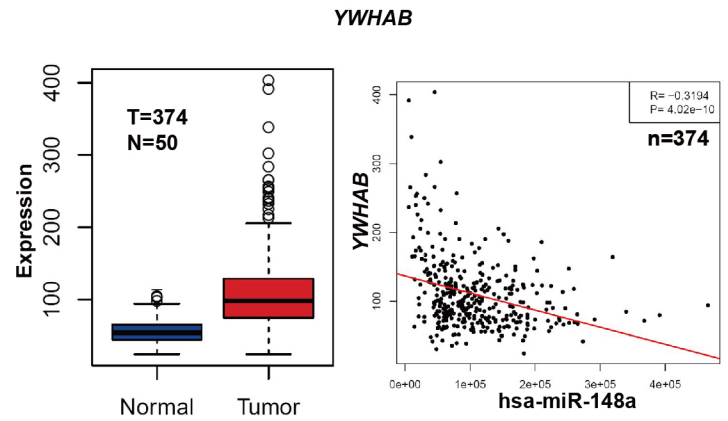

**C**

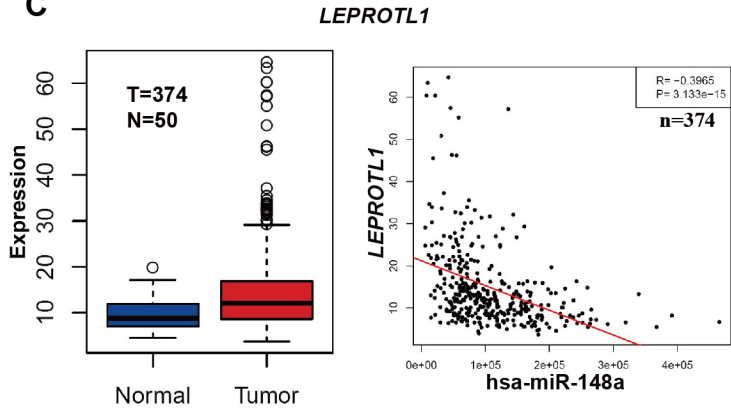

**D**

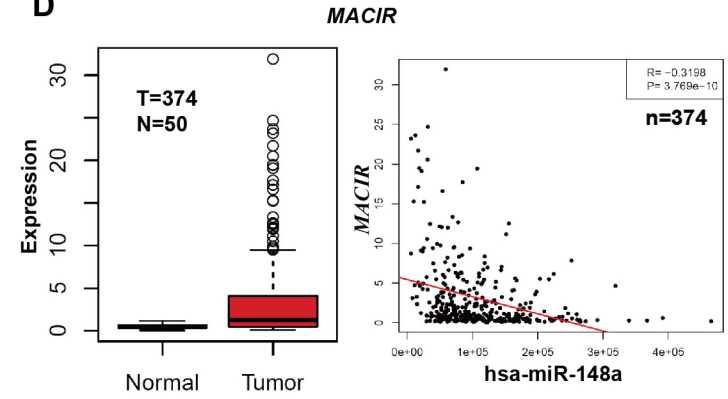

**E**

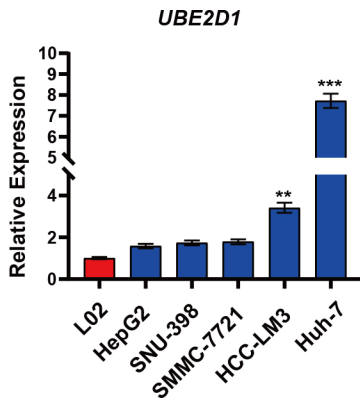

**F**

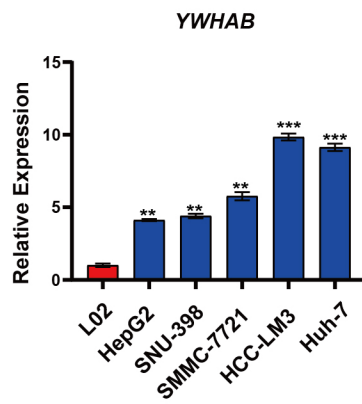

**G**

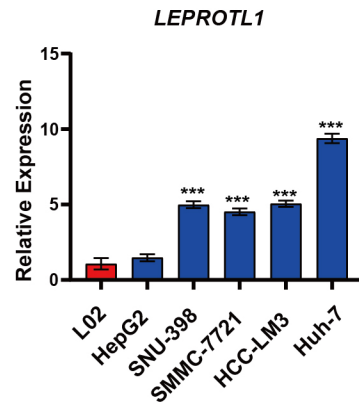

**H**

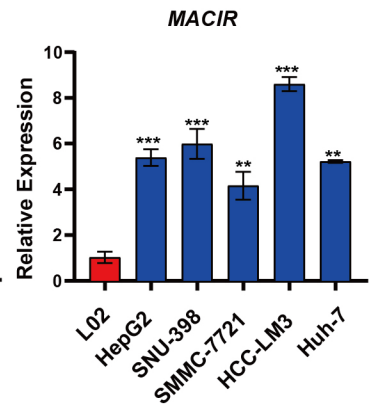

**I**

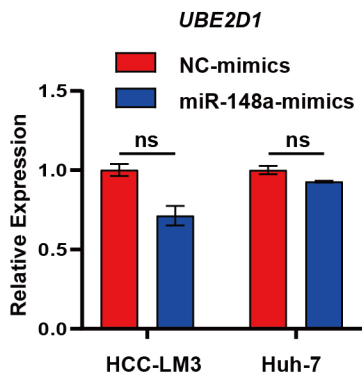

**J**

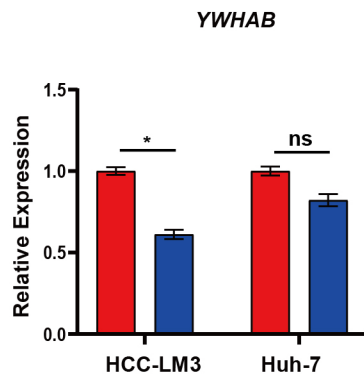

**K**

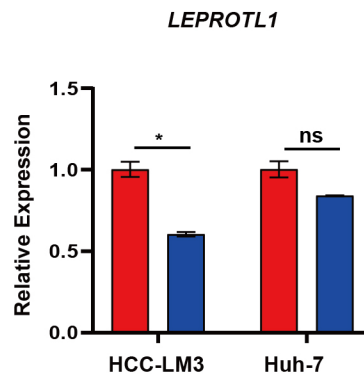

**L**

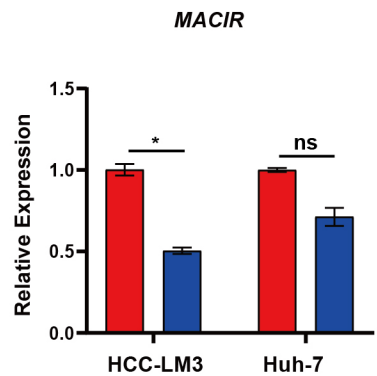

Figure S5

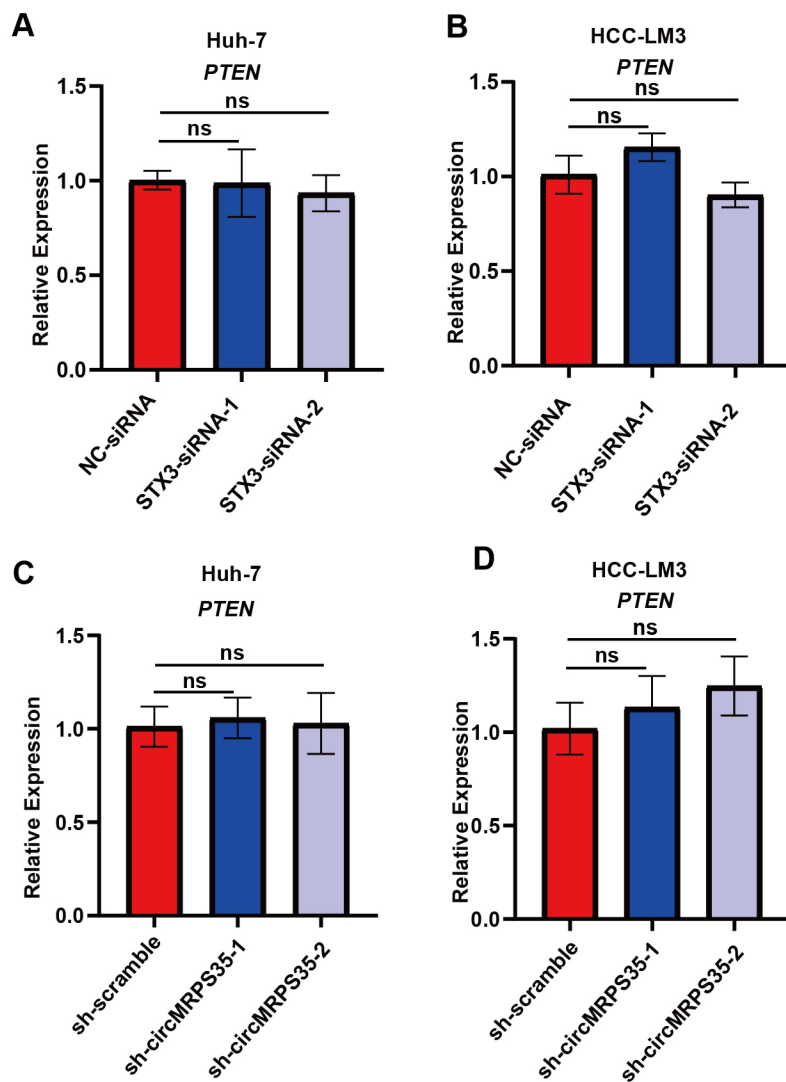

**Figure S6**

**A**

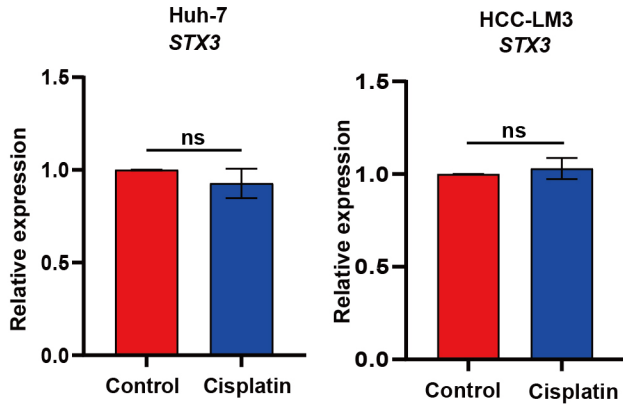

**B**

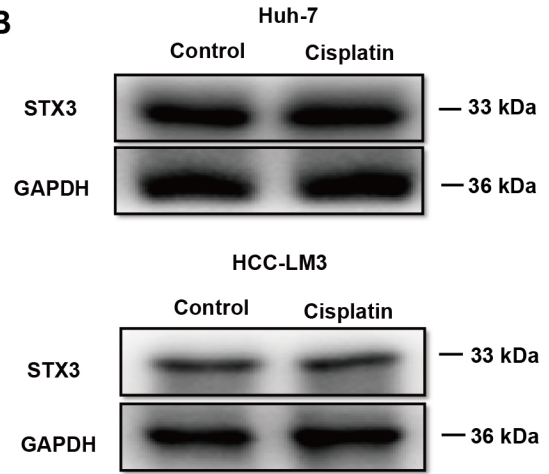

**C**

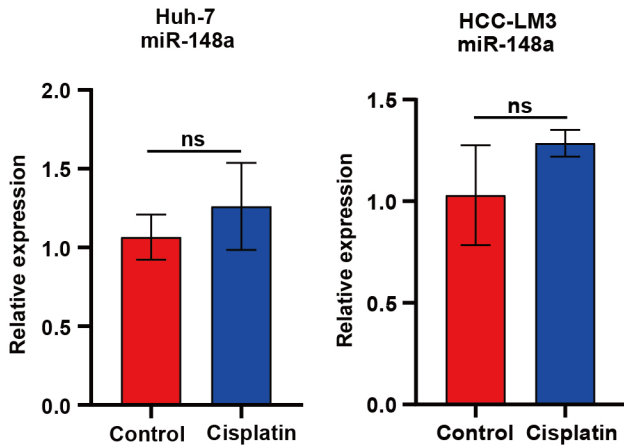

**D**

**circRNADb**  
Database for human circular RNAs

Search

**circRNADb - A Database for Human Circular RNAs**

Protein coding potential

| IRES Elements | Parameter Index      |          |                       |
|---------------|----------------------|----------|-----------------------|
|               | Position (start-end) | R Score  | With Pseudoknot (Y/N) |
|               | 14-158               | 1.907254 | Y                     |
|               | 81-161               | 1.512615 | Y                     |

| Open Reading Frame (ORF) | Start Position | End Position | Protein Length |
|--------------------------|----------------|--------------|----------------|
|                          | 68             | 1*162        | 168 aa         |

Open Reading Frame (ORF)

MAVDQMPSPV YPVAAPFKPS AVPLPVRNGY PVKKGVPMAK EGNLELLKIP NFLHLTPVAI KKHCEALKDF CTEHPAALDS DEKCEKHFTI EIDSDYVSS GPSVRNPRAR VVVLRRKEHP ENKGQERH YLLGQRKULL TRTGLVFTQL QHHLNPLQYL FLFEWVQ\*

Note:  
(1). nr represents n rounds (n<3); (2). \* represents a stop codon.

**Figure S7**

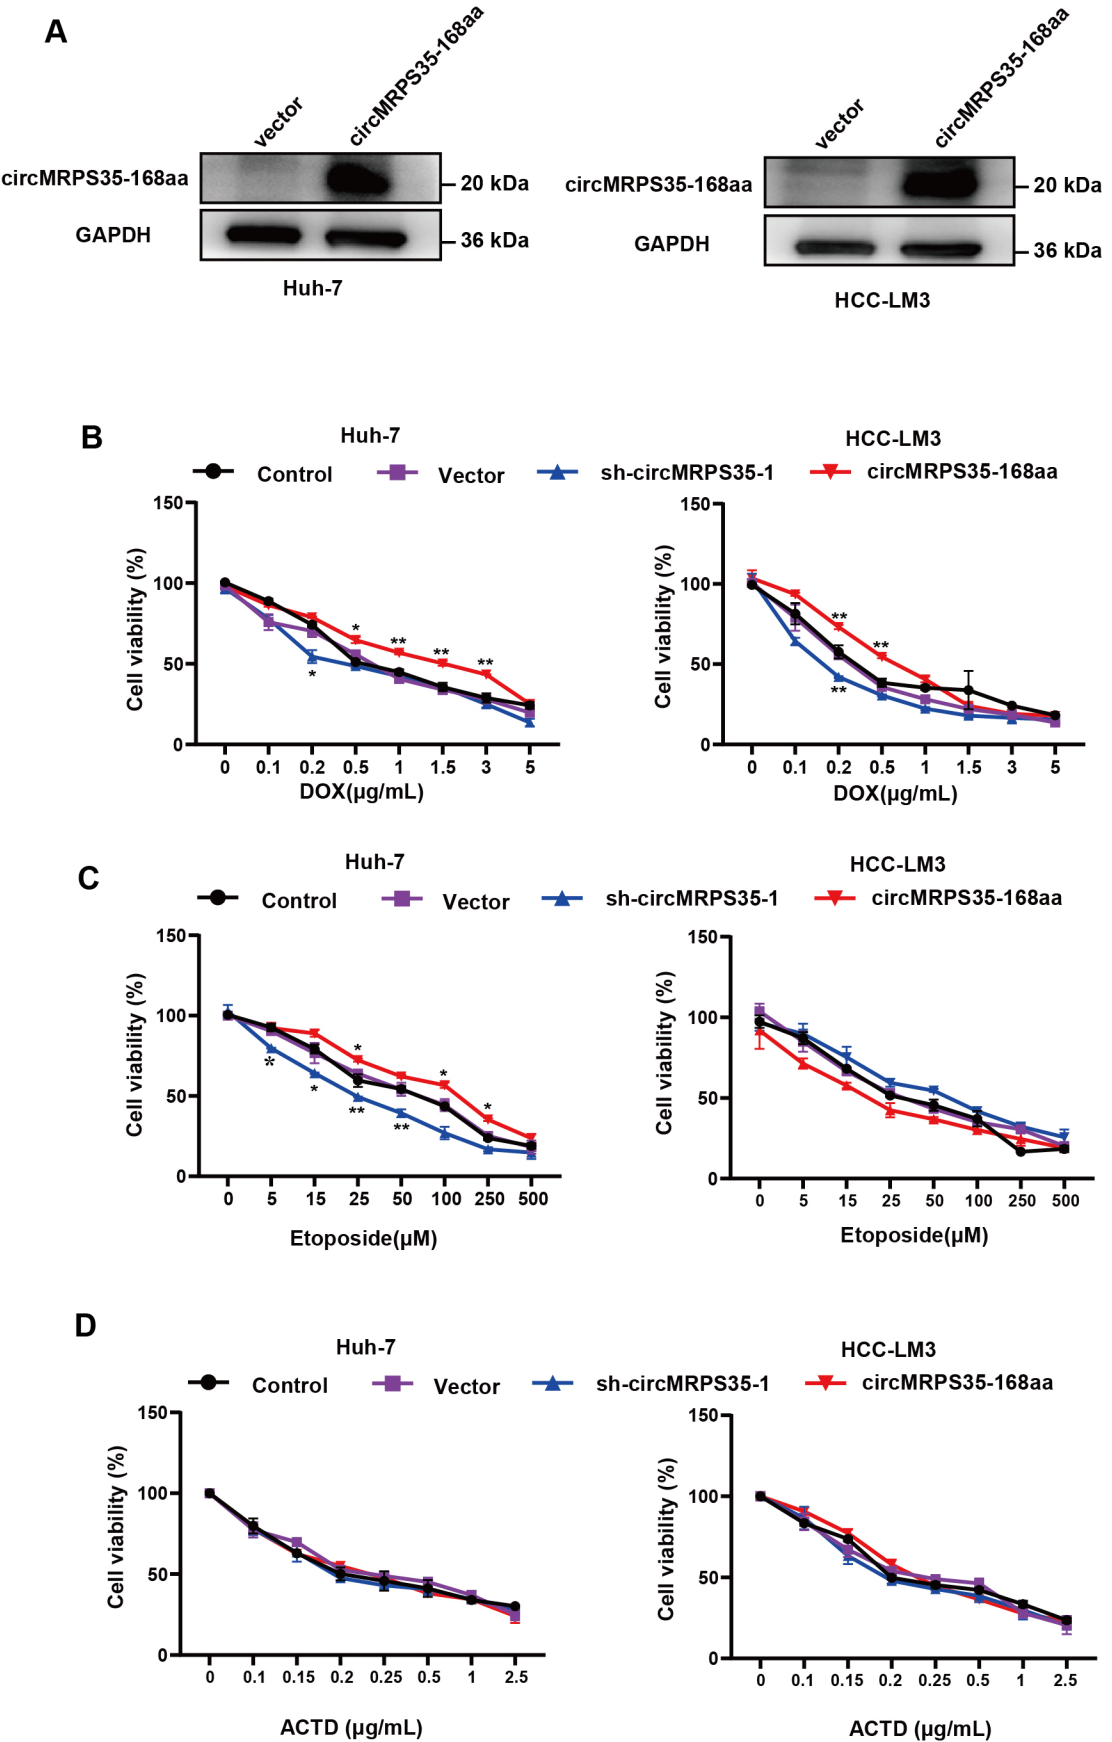



### Supplemental Figure Legends

**Figure S1** (A) Volcano plots analysis of circRNAs in 3 RNA-seq data (GSE77509, GSE114564, GSE159220). (B) Quantitative real-time PCR analysis of the 4 candidates circRNAs in HCC tissues (n = 10) compared with non-tumor adjacent tissues. (C) Schematic representation of circMRPS35 formation. (D) The back-splice junction site of circMRPS35 was validated by Sanger sequencing. (E) Quantitative real-time PCR analysis of circMRPS35 after RNA Nucleocytoplasmic separation, U6 and GAPDH as markers of nucleus and cytoplasm in HepG2, SMMC-7721 and SNU-398 cells, respectively. Error bars represent the means  $\pm$  SEM of 3 independent experiments. \* $P < 0.05$ , \*\* $P < 0.01$ , \*\*\* $P < 0.001$ .

**Figure S2** (A-B) Quantitative real-time PCR analysis of circMRPS35 expression in sh-circMRPS35-1 and sh-scramble Huh-7 and HCC-LM3 cells (n = 6). Error bars represent the means  $\pm$  SEM of 3 independent experiments. \* $P < 0.05$ , \*\* $P < 0.01$ , \*\*\* $P < 0.001$ .

**Figure S3** (A) Expression heat map of 24 target miRNAs with analysis of TCGA database. (B) Kaplan-Meier analysis of the miR-23c, miR-676 and miR-421 in HCC (n = 364). (C) Quantitative real-time PCR analysis of miR-23c, miR-421, miR-676 with AGO2-RIP in Huh-7 and HCC-LM3 cells. (D) Quantitative real-time PCR analysis of circMRPS35 in circMRPS35 overexpression Huh-7 and HCC-LM3 cells. (E) The sequences of miR-148a, miR-148b and miR-152. (F) Expression of miR-148a, miR-148b and miR-152 with analysis of TCGA database (T = 374, N = 50). (G) Kaplan-Meier analysis of the miR-148b and miR-152 in HCC (n = 364). (H) Binding positions of circMRPS35 and miR-148a was showed in Targetscan database. (I) Quantitative real-time PCR analysis of miR-148a in miR-148a-mimics overexpression Huh-7 and HCC-LM3 cells. Error bars represent the means  $\pm$  SEM of 3 independent experiments. \* $P < 0.05$ , \*\* $P < 0.01$ , \*\*\* $P < 0.001$ .

**Figure S4** (A-D) TCGA analysis of *UEB2D1*, *YWHAB*, *LEPROTL1* and *MAC1R* expressions in HCC tissues and correlation analysis of these genes and miR-148a expressions. (E-H) Quantitative real-time PCR assays of *UEB2D1*, *YWHAB*, *LEPROTL1* and *MAC1R* expressions in HCC cell lines compared to L02 cells. (I-L) Quantitative real-time PCR assays of *UEB2D1*, *YWHAB*, *LEPROTL1* and *MAC1R* expressions in miR-148a overexpression Huh-7 and HCC-LM3 cells. Error bars represent the means  $\pm$  SEM of 3 independent experiments. \* $P < 0.05$ , \*\* $P < 0.01$ , \*\*\* $P < 0.001$ .

**Figure S5** (A-B) Quantitative real-time PCR assays of *PTEN* expression in *STX3* silenced or control Huh-7 and HCC-LM3 cells. (C-D) Quantitative real-time PCR assays of *PTEN* expression in circMRPS35 KD or control Huh-7 and HCC-LM3 cells. Error bars represent the means  $\pm$  SEM of 3 independent experiments. \* $P < 0.05$ , \*\* $P < 0.01$ , \*\*\* $P < 0.001$ .

**Figure S6** (A) Quantitative real-time PCR analysis of *STX3* expression in cisplatin treatment or none-treated Huh-7 and HCC-LM3 cells. (B) Western blot analysis of *STX3* expression in cisplatin treatment or none-treated Huh-7 and HCC-LM3 cells. (C) Quantitative real-time PCR analysis of miR-148a expression in cisplatin treatment or none-treated Huh-7 and HCC-LM3 cells. (D) circRNADb database showed IRES regions and the potentially peptide translated by circMRPS35. Error bars represent the means  $\pm$  SEM of 3 independent experiments.

**Figure S7** (A) Western blot analysis of circMRPS35-168aa in circMRPS35-168aa overexpression Huh-

7 and HCC-LM3 cells, GAPDH as the control. (B-D) Cell viability assay of different circMRPS35-168aa expressed Huh-7 and HCC-LM3 cells with different concentrations of DOX, Etoposide and ACTD treatment. Error bars represent the means  $\pm$  SEM of 3 independent experiments. \* $P < 0.05$ , \*\* $P < 0.01$ , \*\*\* $P < 0.001$ .

### Supplemental Table

| Table S1 The List of Primers |                        |                          |
|------------------------------|------------------------|--------------------------|
| Gene                         | Forward (5'-3')        | Reverse (5'-3')          |
| circMRPS35                   | CCCCAGAGCACGAGTAGTAG   | TGCTGCAACTGGGTAAACAC     |
| MRPS35                       | GGAAAGAACACCCGGAAATGA  | GTGCTGCAACTGGGTAAACAC    |
| $\beta$ -ACTIN               | AGTGTGACGTGGACATCCGCA  | ATCCACATCTGCTGGAAGGTGGAC |
| hsa_circ_0072309             | TTCCACACCGCTCAAATGTT   | AGCCACTGGAAATTTGAAGCA    |
| hsa_circ_0002566             | AGCCTCACCTGATAACCTGT   | AATTCCGTTGTGCAGTGTCC     |
| hsa_circ_0004458             | ACAGGAATGACGCTGGATCA   | GTGTTGTTTTACCCAGCA       |
| U6                           | CTCGCTTCGGCAGCACA      | AACGCTTCACGAATTTGCGT     |
| U48                          | AGTGATGATGACCCAGGTA    | CTCAACTGGTGTGCTGGGA      |
| GAPDH                        | GGAGCGAGATCCCTCCAAAAT  | GGCTGTTGTCATACTTCTCATGG  |
| sh-scramble                  | CAACAAGATGAAGAGCACCAA  | TTGGTGCTCTTCATCTTGTG     |
| sh-circMRPS35-1              | GTAGTCTTAAGACGGAAAG    | CTTCCGTCCTTAAGACTAC      |
| sh-circMRPS35-2              | GTCTTAAGACGGAAAGAAC    | GTTCTTCCGTCCTTAAGAC      |
| miR-148a                     | GCCGAGTCAGTGCCTACAG    | CTCAACTGGTGTGCTGGGA      |
| miR-421                      | GCCGAGATCAACAGACATTAA  | CTCAACTGGTGTGCTGGGA      |
| miR-23c                      | GCCGAGATCACATTGCCAGT   | CTCAACTGGTGTGCTGGGA      |
| miR-676                      | GCCGAGCTGTCCTAAGGTT    | CTCAACTGGTGTGCTGGGA      |
| STX3                         | TCGGCAGACCTTCGGATTC    | TCCTCATCGGTTGTCTTTTTGC   |
| LEPROTL1                     | TTTGATGCTTGGATGTGCCCT  | GCCCGTTGTAAGAAAGATGGC    |
| YWHAB                        | CATGAAGGCAGTCACAGAACA  | CTCACGGTACTCTTTGCCAT     |
| UBE2D1                       | TAGCGCATATCAAGGTGGAGT  | TGGTGACCATTGTGACCTCAG    |
| MACIR                        | ACCGTGTGACGGCTACCAGAT  | TGTTTGGAGCGTAAGGATGGC    |
| PTEN                         | TTTGAAGACCATAACCCACCAC | ATTACACCAGTTCGTCCCTTTC   |
| NC-siRNA                     | UUCUCCGAACGUGUCACGUTT  | ACGUGACACGUUCGGAGAATT    |
| STX3-siRNA-1                 | GGAGAAGCAUUAUGAAGAAGA  | UCUUCUCAAUAUGCUUCUCC     |
| STX3-siRNA-2                 | GCAAGCCUCAGUGAGAUUGA   | UCAAUCUCACUGAGGGCUUGC    |

**Table S2 The expressions of circRNAs in GSE77509**

**Table S3 The expressions of circRNAs in GSE114564**

**Table S4 The expressions of circRNAs in GSE159220**

**Table S5 The List of microRNAs**
